# Supplementary material for: Early Transcriptomic Changes upon Thalidomide Exposure Influence the Later Neuronal Development in Human Embryonic Stem Cell-Derived Spheres
Source: Int J Mol Sci. 2020 Aug 3;21(15):5564. doi: 10.3390/ijms21155564 (PMC7432054; doi:10.3390/ijms21155564)
Supplement: Supplementary file 1 [file ijms-21-05564-s001.zip › ijms-855204 (Table S1)-resubmit.pdf]

Table S1. Lists of the common TMD-specific genes seselected after the comparison between TMD and each of the three chemicals correspondingly for IPA-pathway analysis

| Gene Symbol   |                |            |                    |         |                  |           |          |
|---------------|----------------|------------|--------------------|---------|------------------|-----------|----------|
| ABCA5         | CDH6           | FAHD2A     | IFI6               | LUZP2   | ONECUT1          | SCIMP     | THSD7A   |
| ABLM2         | CES3           | FAM124B    | IKZF1              | MAGI3   | OOEP             | SCN1B     | TIAM2    |
| ACTG2         | CFAP70         | FAM167A    | INSM1              | MAJIN   | OPRL1            | SCNN1B    | TM4SF18  |
| AFAP1L2       | CFC1/CFC1B     | FAM228A    | IRX1               | MAL     | OR4X2            | SEC1P     | TMEM130  |
| AFMID         | CHD5           | FAM83A-AS1 | ISLR2              | MAP2    | OR52A1           | SEMA3G    | TMEM132C |
| AK4           | CKMT2          | FAT3       | JAKMIP1            | MAP6    | OSCP1            | SGPP1     | TNIK     |
| AKR1C1/AKR1C2 | CLC            | FAT4       | JPX                | MC1R    | P4HA2            | SH2D6     | TRIM15   |
| ANGPT1        | CLDND2         | FBN2       | KALRN              | MCOLN3  | PBOV1            | SHISA3    | TRIM22   |
| ANKRD19P      | CLEC4GP1       | FBR5       | KANSL1L            | ME1     | PCBP1-AS1        | SHOX      | TRPC4    |
| ANKRD6        | CLIC3          | FBXO15     | KAZALD1            | MED31   | PCBP3            | SLC16A12  | TTC41P   |
| ANXA8/ANXA8L1 | CLSTN2         | FBXO31     | KCNA7              | MEIOB   | PCDH11X          | SLC16A3   | TTN      |
| APBA2         | CNGA1          | FBXO48     | KCNH5              | MFAP3L  | PCDH11Y          | SLC22A11  | TYRO3P   |
| AQP4          | COL12A1        | FEZF1      | KCNJ2              | MISP    | PCDH9            | SLC24A1   | UBE2D3   |
| ARID5B        | COL24A1        | FGFR3      | KCNJ4              | MME     | PCDHAC2          | SLC26A5   | USP3     |
| ATP10A        | COL5A2         | FIGNL2     | KCNMA1             | MOB3C   | PCDHGB2          | SLC37A2   | VAV1     |
| ATP2A3        | CPLANE2        | FLRT3      | KDM2B              | MROCK1  | PDE4B            | SLC41A2   | VSNL1    |
| ATP6V0D1      | CPLX3          | FMOD       | KHDRBS2            | MROH1   | PHC2             | SLC4A4    | VSTM2B   |
| BCAR1         | CP0            | FNDC1      | KIAA0408           | MSN     | PIGZ             | SLC9A5    | VSX2     |
| BHLHE40       | CREB5          | FOXA2      | KLHDC7A            | MT1B    | PLEK2            | SLC9B1    | WIF1     |
| BIRC5         | CRHR1          | FOXJ1      | LBX2               | MT1E    | PLEKHM3          | SLED1     | YPEL2    |
| BNIP1         | CRTAC1         | FRMPD4     | LCP2               | MT1F    | PPIAP46          | SMDT1     | ZAN      |
| BRD7P3        | CRYBA4         | FRZB       | LDHD               | MT1G    | PRDM14           | SMIM22    | ZNF44    |
| BST2          | CRYBB1         | GOS2       | LHX1               | MT1H    | PRDM6            | SNED1     | ZNF699   |
| BTN3A1        | CTAG1A/CTAG1B  | GAD2       | LILRB4             | MT1HL1  | PRDM8            | SOBP      | ZNF818P  |
| C10orf25      | CXXC4          | GAGE7      | LILRB5             | MT1X    | PRKCD            | SOCS2-AS1 | ZNF880   |
| C1QL1         | CYP11B1-AS1    | GALNT18    | LIMCH1             | MTRR    | PRPH2            | SORCS1    | ZNRD1ASP |
| C1QL2         | CYP26A1        | GALNT9     | LINC00112          | MTSS1   | PSD4             | SPAG4     | ZXDA     |
| C1QL3         | DACT1          | GCSAM      | LINC00312          | MYORG   | PTGER2           | SPARCL1   |          |
| C2CD4D-AS1    | DDIT4L         | GDPD5      | LINC00458          | NABP1   | PTPRT            | SPATA6L   |          |
| C3orf35       | DDX43          | GHRL       | LINC01091          | NAT8B   | PVT1             | SRPK3     |          |
| C4orf51       | DDX58          | GJB7       | LINC01108          | NATD1   | PWWP2A           | STAB1     |          |
| C6orf141      | DEF6           | GPD1       | LINC01501          | NCKAP5L | PWWP3B           | STMN4     |          |
| C9orf64       | DENND4C        | GPR39      | LINC01530          | NCR3LG1 | RAB26            | SUPT3H    |          |
| CA4           | DGCR10         | GRAMD1B    | LINC01829          | NECTIN4 | RABL2A           | SUSD4     |          |
| CA7           | DGKK           | GRIA3      | LINC02783          | NEUROD2 | RAMP1            | SVIL      |          |
| CABP7         | DIPK1A         | GRIA4      | LOC100288966/POTED | NFKBIZ  | RAP1GAP2         | SYT4      |          |
| CACNB4        | DMRT1          | GRIN2A     | LOC100506282       | NFXL1   | RASSF10          | SYTL1     |          |
| CALN1         | DPPA5          | GUCA1B     | LOC101926907       | NIPAL1  | RASSF3           | SZT2      |          |
| CAPN6         | EBF3           | GUCD1      | LOC101927857       | NLRP12  | RGS7             | TAS2R5    |          |
| CARD6         | EDNRB          | H1-6       | LOC101929333       | NNAT    | RHOU             | TBC1D22A  |          |
| CCBE1         | EEF1AKMT4-ECE2 | H2AC2P     | LOC105373042       | NODAL   | RIC1             | TCAIM     |          |
| CCDC141       | EGR4           | HCN1       | LOC107983985       | NOX4    | RIPPLY3          | TCAM1P    |          |
| CCDC149       | ELMOD1         | HES2       | LOC107985840       | NPFFR2  | RNA5-8SN5        | TCTE3     |          |
| CCDC80        | EPHB1          | HFM1       | LOC107986268       | NPPB    | RNF180           | TEK       |          |
| CKK           | ERCC6L2        | HHEX       | LOC642648          | NPY1R   | RSPH10B/RSPH10B2 | TENM4     |          |
| CCN3          | ERVMER34-1     | HHLA1      | LOC729291          | NRP1    | RUNX1            | TENT5A    |          |
| CCNE2         | ESYT2          | HPGD       | LOXL2              | NUGGC   | S100A11          | TET2      |          |
| CCNG2         | EVX2           | HTR6       | LRRC42             | NUP58   | S100A16          | TFAP2E    |          |
| CCR7          | F10            | ID2        | LRRC4C             | OC90    | S1PR5            | TFF3      |          |
| CD300A        | F12            | ID12-AS1   | LRRC72             | OLIG3   | SCD5             | TFPI      |          |
