# Supplementary material for: Early Transcriptomic Changes upon Thalidomide Exposure Influence the Later Neuronal Development in Human Embryonic Stem Cell-Derived Spheres
Source: Int J Mol Sci. 2020 Aug 3;21(15):5564. doi: 10.3390/ijms21155564 (PMC7432054; doi:10.3390/ijms21155564)
Supplement: Supplementary file 1 [file ijms-21-05564-s001.zip › ijms-855204 (Table S2)-resubmit.pdf]

**Table S2. Prediction of expression patterns of genes involved in the function of “Differenti**

| Gene Symbol | Type                       | Expression Fold<br>Change<br>(TMD/DMSO) | Prediction based on<br>measurement direction |
|-------------|----------------------------|-----------------------------------------|----------------------------------------------|
| TET2        | enzyme                     | 3.08                                    | Increased                                    |
| HHEX        | transcription regulator    | 2.00                                    | Increased                                    |
| ID2         | transcription regulator    | 2.30                                    | Increased                                    |
| NRP1        | transmembrane receptor     | 2.28                                    | Increased                                    |
| NPY1R       | G-protein coupled receptor | 0.45                                    | Affected                                     |
| NODAL       | growth factor              | 0.39                                    | Affected                                     |
| COL12A1     | other                      | 2.82                                    | Affected                                     |
| FRZB        | other                      | 3.84                                    | Affected                                     |
| KDM2B       | enzyme                     | 0.46                                    | Increased                                    |
| FOXA2       | transcription regulator    | 0.39                                    | Decreased                                    |
| RUNX1       | transcription regulator    | 0.48                                    | Decreased                                    |
| IL6ST       | transmembrane receptor     | 0.49                                    | Increased                                    |
| ANGPT1      | growth factor              | 0.28                                    | Decreased                                    |

**ation of embryonic cells” by IPA.**

|                      |
|----------------------|
| Privouse Findings in |
| Ingenuity Knowledge  |
| Base                 |
| Increases            |
| Increases            |
| Increases            |
| Increases            |
| Affects              |
| Affects              |
| Affects              |
| Affects              |
| Decreases            |
| Increases            |
| Increases            |
| Decreases            |
| Increases            |
